# Supplementary material for: Schoolyard physical activity of 6–11 year old children assessed by GPS and accelerometry
Source: PubMed Central journal article supplement (PMC3751773; doi:10.1186/1479-5868-10-97), 2013-08-14
Supplement: 1479-5868-10-97-S1.pdf [file 1479-5868-10-97-S1.pdf]

Additional file 1: Table S1. Mean counts per 15 second epoch, inside school and on the schoolyard. Mean counts on the schoolyard are further differentiated for segment of the day.

|                    |                 | Location         | Mean  | (±SD)    |
|--------------------|-----------------|------------------|-------|----------|
| Counts per 15 sec. | Boys<br>(n=32)  | Inside School    | 59.7  | (±34.0)  |
|                    |                 | Schoolyard       | 388.9 | (±135.5) |
|                    |                 | - Pre school     | 260.2 | (±98.9)  |
|                    |                 | - School Recess* | 523.9 | (±180.3) |
|                    |                 | - Lunch Break    | 377.7 | (±146.8) |
|                    |                 | - Post School    | 376.1 | (±203.5) |
|                    | Girls<br>(n=44) | Inside School    | 78.0  | (±87.6)  |
|                    |                 | Schoolyard       | 289.5 | (±132.1) |
|                    |                 | - Pre school     | 238.3 | (±121.5) |
|                    |                 | - School Recess* | 382.3 | (±171.9) |
|                    |                 | - Lunch Break    | 310.3 | (±143.1) |
|                    |                 | - Post School    | 274.3 | (±157.3) |

\*Differences between school recess and all other segments of day are significant (p<0.01).
